# Supplementary material for: Tuning the ligand field in seven-coordinate Dy(iii) complexes to perturb single-ion magnet behavior
Source: Royal Society of Chemistry journal article supplement (doi:10.1039/d1nj00734c), 2021-01-01
Supplement: d1nj00734c1.pdf [file d1nj00734c1.pdf]

## **Tuning the ligand field in seven-coordinate Dy(III) complexes to perturb single-ion magnet behavior**

Chunyang Zhang,<sup>a</sup> Zhijie Cheng,<sup>a</sup> Pengfei Tan,<sup>a</sup> Wei Lv,<sup>b</sup> Huihui Cui, Lei Chen,<sup>\*a</sup> Xingwei Cai,<sup>\*a</sup> Yuyuan Zhao<sup>\*d</sup> and Aihua Yuan<sup>\*a</sup>

<sup>a</sup>*School of Environmental and Chemical Engineering, Jiangsu University of Science and Technology, Zhenjiang 212003, P. R. China. E-mail: chenlei@just.edu.cn, scxwh@just.edu.cn, aihua.yuan@just.edu.cn.*

<sup>b</sup>*State Key Laboratory of Coordination Chemistry, School of Chemistry and Chemical Engineering, Nanjing University, Nanjing 210093, P. R. China.*

<sup>c</sup>*School of Chemistry and Chemical Engineering, Nantong University, Nantong 226019, P. R. China.*

<sup>d</sup>*School of Medical Technology, Zhenjiang College, Zhenjiang 212003, P. R. China. E-mail: zhaoyuyuan@zjc.edu.cn.*

**Electronic Supplementary Information**



Fig. S1. The powder X-ray diffraction patterns of **1** at room temperature.



Fig. S2. The powder X-ray diffraction patterns of **2** at room temperature.



Fig. S3. IR spectra for complexes 1 and 2.



Fig. S4. ORTEP drawing of 1. H atoms are omitted for clarity.



Fig. S5. ORTEP drawing of 2. H atoms are omitted for clarity.

**Table S1** Selected bond lengths (Å) and angles (°) for both complexes.

| <b>1</b>   |            | <b>2</b>   |            |             |            |
|------------|------------|------------|------------|-------------|------------|
|            |            | Dy1        |            | Dy2         |            |
| Dy1-N1     | 2.5658(18) | Dy1-N4     | 2.566(4)   | Dy2-N11     | 2.588(4)   |
| Dy1-N2     | 2.539(2)   | Dy1-N5     | 2.530(4)   | Dy2-N12     | 2.520(5)   |
| Dy1-N3     | 2.510(2)   | Dy1-N6     | 2.536(4)   | Dy2-N13     | 2.505(5)   |
| Dy1-N4     | 2.543(2)   | Dy1-N7     | 2.502(4)   | Dy2-N14     | 2.548(5)   |
| Dy1-Cl1    | 2.6218(7)  | Dy1-O1     | 2.198(4)   | Dy2-O13     | 2.185(4)   |
| Dy1-Cl2    | 2.6093(7)  | Dy1-O4     | 2.257(4)   | Dy2-O10     | 2.193(4)   |
| Dy1-Cl3    | 2.6052(7)  | Dy1-O7     | 2.225(3)   | Dy2-O16     | 2.273(4)   |
| <hr/>      |            |            |            |             |            |
| N1-Dy1-N2  | 65.23(6)   | N4-Dy1-N5  | 65.48(13)  | N11-Dy2-N12 | 67.13(15)  |
| N1-Dy1-N3  | 65.00(6)   | N4-Dy1-N6  | 66.50(13)  | N11-Dy2-N13 | 66.53(15)  |
| N1-Dy1-N4  | 64.19(6)   | N4-Dy1-N7  | 66.83(14)  | N11-Dy2-N14 | 64.83(15)  |
| N1-Dy1-Cl1 | 113.67(4)  | N4-Dy1- O1 | 77.96(14)  | N11-Dy2-O10 | 77.50(14)  |
| N1-Dy1-Cl2 | 126.07(4)  | N4-Dy1- O4 | 128.78(13) | N11-Dy2-O13 | 144.77(15) |
| N1-Dy1-Cl3 | 127.97(4)  | N4-Dy1-O7  | 142.49(13) | N11-Dy2-O16 | 126.52(14) |

**Table S2** The results of the continuous shape measure (CShM) analyses for complexes **1** and **2** by SHAPE software.

| CShM                               | <b>1</b> | <b>2</b> |        |
|------------------------------------|----------|----------|--------|
|                                    |          | Dy1      | Dy2    |
| Heptagon ( $D_{7h}$ )              | 35.550   | 34.454   | 33.787 |
| Hexagonal pyramid ( $C_{6v}$ )     | 21.033   | 21.409   | 21.357 |
| Pentagonal bipyramid ( $D_{5h}$ )  | 5.734    | 4.351    | 4.898  |
| Capped octahedron ( $C_{3v}$ )     | 2.295    | 2.269    | 1.932  |
| Capped trigonal prism ( $C_{2v}$ ) | 2.891    | 1.694    | 1.295  |



**Fig. S6.** The structural features for two ideal polyhedrons.



**Fig. S7.** The shortest distance of Dy(III) ions between neighbor molecules for **1**.



**Fig. S8.** The shortest distance of Dy(III) ions between neighbor molecules for **2**.

**Table S3** Crystal field parameters for **1** and **2** fitted from  $\chi_M T$  vs.  $T$  and  $M$  vs.  $H$  simultaneously.

|          | $B_0^2$ (cm <sup>-1</sup> ) | $B_0^4$ (cm <sup>-1</sup> ) | $B_2^4$ (cm <sup>-1</sup> ) | $B_4^4$ (cm <sup>-1</sup> ) |
|----------|-----------------------------|-----------------------------|-----------------------------|-----------------------------|
| <b>1</b> | 101.4                       | 479.5                       | -99.2                       | 69.7                        |
| <b>2</b> | 151.6                       | 14.9                        | 276.6                       | -0.8                        |

**Table S4** Energy levels, eigenstates and  $g$  for **1** and **2** simulated from crystal field parameters in Table S3.

|          | Energy / cm <sup>-1</sup> | $g$                                        | Eigenstate                                  |
|----------|---------------------------|--------------------------------------------|---------------------------------------------|
| <b>1</b> | 0                         | 0.0008                                     | $\pm 11/2$ >                                |
|          |                           | 0.0011                                     |                                             |
|          |                           | 14.6582                                    |                                             |
|          | 52                        | 0.0065                                     | $99\% \pm 9/2\rangle + 1\% \pm 11/2\rangle$ |
|          |                           | 0.0086                                     |                                             |
|          |                           | 12.0509                                    |                                             |
|          | 200                       | 0.0006                                     | $99\% \pm 13/2\rangle + 1\% \pm 9/2\rangle$ |
|          |                           | 0.0008                                     |                                             |
|          |                           | 17.2794                                    |                                             |
|          | 240                       | 0.0119                                     | $\pm 7/2$                                   |
| 0.0266   |                           |                                            |                                             |
| 9.3402   |                           |                                            |                                             |
| 462      | 0.9239                    | $\pm 5/2$                                  |                                             |
|          | 0.9328                    |                                            |                                             |
|          | 6.6428                    |                                            |                                             |
| 649      | 1.2396                    | $99\% \pm 3/2\rangle + 1\% \pm 1/2\rangle$ |                                             |

---

|          |          |         |                                                                                                  |
|----------|----------|---------|--------------------------------------------------------------------------------------------------|
|          |          | 2.9710  |                                                                                                  |
|          |          | 3.9243  |                                                                                                  |
| 757      |          | 1.2811  | $99\% \pm 1/2\rangle + 1\% \pm 3/2\rangle$                                                       |
|          |          | 8.4828  |                                                                                                  |
|          |          | 12.7232 |                                                                                                  |
| 791      |          | 0.0000  | $\pm 15/2$                                                                                       |
|          |          | 0.0000  |                                                                                                  |
|          |          | 19.9982 |                                                                                                  |
| <b>2</b> | <b>0</b> | 0.0002  | $88\% \pm 15/2\rangle + 11\% \pm 11/2\rangle + \dots$                                            |
|          |          | 0.0002  |                                                                                                  |
|          |          | 19.3663 |                                                                                                  |
| 55       |          | 0.0001  | $82\% \pm 13/2\rangle + 17\% \pm 9/2\rangle + \dots$                                             |
|          |          | 0.0006  |                                                                                                  |
|          |          | 16.3726 |                                                                                                  |
| 114      |          | 0.2569  | $65\% \pm 11/2\rangle + 24\% \pm 9/2\rangle + 10\% \pm 15/2\rangle + \dots$                      |
|          |          | 0.3885  |                                                                                                  |
|          |          | 13.7722 |                                                                                                  |
| 138      |          | 1.3707  | $43\% \pm 1/2\rangle + 27\% \pm 3/2\rangle + 24\% \pm 5/2\rangle + 3\% \pm 9/2\rangle + \dots$   |
|          |          | 2.3397  |                                                                                                  |
|          |          | 16.8599 |                                                                                                  |
| 159      |          | 1.6720  | $51\% \pm 9/2\rangle + 10\% \pm 3/2\rangle + 7\% \pm 5/2\rangle + 3\% \pm 1/2\rangle + \dots$    |
|          |          | 2.2651  |                                                                                                  |
|          |          | 9.5773  |                                                                                                  |
| 173      |          | 1.1050  | $38\% \pm 7/2\rangle + 22\% \pm 5/2\rangle + 13\% \pm 11/2\rangle + 12\% \pm 9/2\rangle + \dots$ |
|          |          | 2.7069  |                                                                                                  |
|          |          | 16.4713 |                                                                                                  |
| 181      |          | 2.3470  | $35\% \pm 7/2\rangle + 31\% \pm 5/2\rangle + 17\% \pm 3/2\rangle + 6\% \pm 9/2\rangle + \dots$   |
|          |          | 7.3734  |                                                                                                  |
|          |          | 10.1772 |                                                                                                  |
| 218      |          | 0.2051  | $51\% \pm 1/2\rangle + 34\% \pm 3/2\rangle + 14\% \pm 5/2\rangle + 1\% \pm 7/2\rangle + \dots$   |
|          |          | 0.2503  |                                                                                                  |
|          |          | 19.3284 |                                                                                                  |

---



**Fig. S9.** Frequency dependence of out-of-phase ( $\chi_M''$ ) ac susceptibility at 1.8 K under the applied dc fields of 0 and 1000 Oe for **1**. The solid lines are for eye guide.



**Fig. S10.** Frequency dependence of out-of-phase ( $\chi_M''$ ) ac susceptibility at 1.8 K under the applied dc fields of 0 and 1500 Oe for **2**. The solid lines are for eye guide.

**Table S5** The parameters obtained by fitting Cole-Cole plot under 1.0 kOe dc field for **1**.

| T / K | $\chi_s$ | $\Delta\chi_1$ | $\tau_1$ | $\alpha_1$ | $\Delta\chi_2$ | $\tau_2$ | $\alpha_2$ |
|-------|----------|----------------|----------|------------|----------------|----------|------------|
| 1.8   | 0.69     | 2.33           | 0.00609  | 0.12       | 1.28           | 0.148    | 0.32       |
| 2.0   | 0.62     | 2.29           | 0.00501  | 0.15       | 0.78           | 0.104    | 0.20       |
| 2.2   | 0.58     | 2.24           | 0.00396  | 0.15       | 0.55           | 0.086    | 0.16       |
| 2.4   | 0.59     | 1.84           | 0.00284  | 0.08       | 1.06           | 0.096    | 0.64       |
| 2.6   | 0.60     | 1.93           | 0.00204  | 0.09       | 0.32           | 0.052    | 0.00       |
| 2.8   | 0.27     | 2.19           | 0.00106  | 0.15       | 0.21           | 0.026    | 0.00       |



**Fig. S11.** The  $\ln(\tau)$  versus  $T^{-1}$  plots for complex **1**.

**Table S6** The parameters obtained by fitting Cole-Cole plot under 1.5 kOe dc field for **2**.

| T / K | $\chi_s$ | $\chi_T$ | $\tau$   | $\alpha$ |
|-------|----------|----------|----------|----------|
| 1.9   | 0.67     | 7.86     | 0.0628   | 0.63     |
| 2.2   | 0.82     | 6.36     | 0.0292   | 0.58     |
| 2.3   | 0.83     | 6.07     | 0.0251   | 0.57     |
| 2.4   | 0.88     | 5.66     | 0.0192   | 0.54     |
| 2.5   | 0.87     | 5.38     | 0.0156   | 0.53     |
| 2.6   | 0.89     | 5.11     | 0.0137   | 0.52     |
| 2.7   | 0.95     | 4.85     | 0.0114   | 0.48     |
| 2.8   | 0.92     | 4.61     | 0.00940  | 0.48     |
| 3.0   | 0.92     | 4.37     | 0.00831  | 0.47     |
| 3.2   | 1.01     | 3.97     | 0.00592  | 0.39     |
| 3.5   | 0.99     | 3.61     | 0.00426  | 0.35     |
| 3.8   | 1.02     | 3.29     | 0.00303  | 0.28     |
| 4.1   | 1.00     | 3.06     | 0.00216  | 0.23     |
| 4.4   | 0.97     | 2.88     | 0.00155  | 0.21     |
| 4.7   | 0.95     | 2.71     | 0.00110  | 0.18     |
| 5.0   | 0.92     | 2.60     | 0.000783 | 0.17     |
| 5.5   | 0.88     | 2.35     | 0.000390 | 0.16     |
| 6.0   | 0.75     | 2.17     | 0.000164 | 0.19     |



**Fig. S12.** The orientation of the magnetic easy axes (black) obtained according to an electrostatic model for **1**.



**Fig. S13.** The orientation of the magnetic easy axes (black) obtained according to an electrostatic model for **2**.
